# Supplementary material for: Theoretical analyses of the fluorescence lifetimes of thed-amino acid oxidase–benzoate complex dimer from porcine kidney: molecular dynamics simulation and photoinduced electron transfer
Source: Royal Society of Chemistry journal article supplement (doi:10.1039/c4ra05211k), 2014-01-01
Supplement: c4ra05211k1.pdf [file c4ra05211k1.pdf]

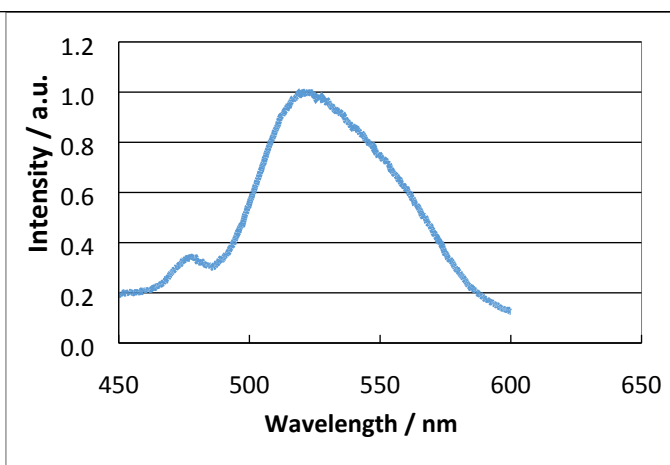

Fig. S1 Fluorescence spectrum of the DAOB dimer with an excitation wavelength of 410 nm.

The protein was dissolved in 0.017 M pyrophosphate buffer (pH 8.3) at 10  $\mu$ M.

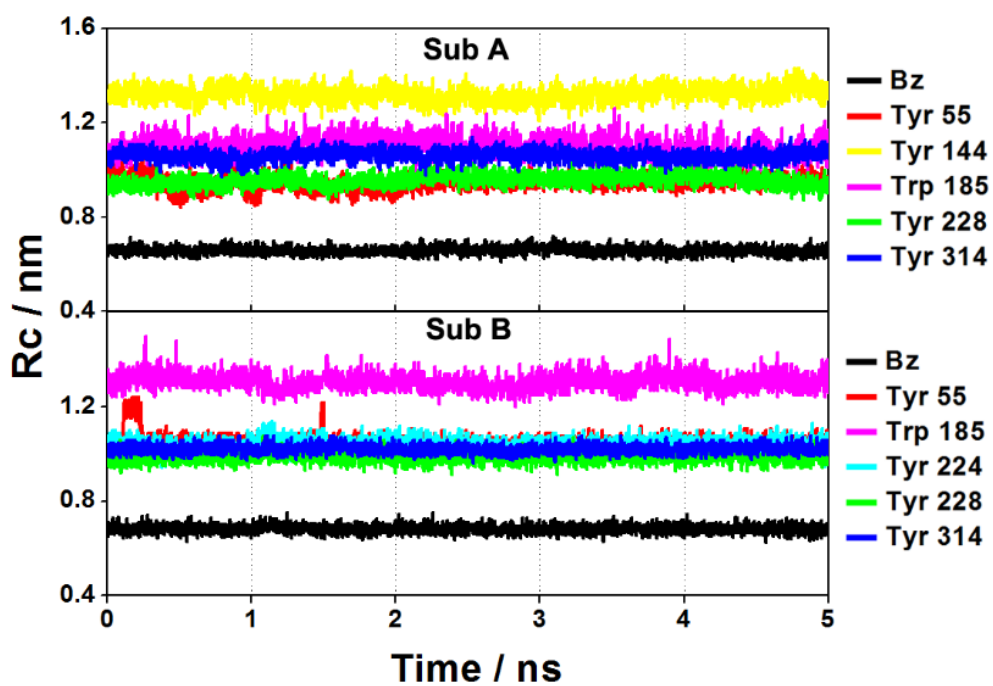

Fig. S2 Time-evolution of the  $R_c$  between Iso and the six nearest potential ET donors in the DAOB dimer.  $R_c$  denotes centre-to-centre distance.

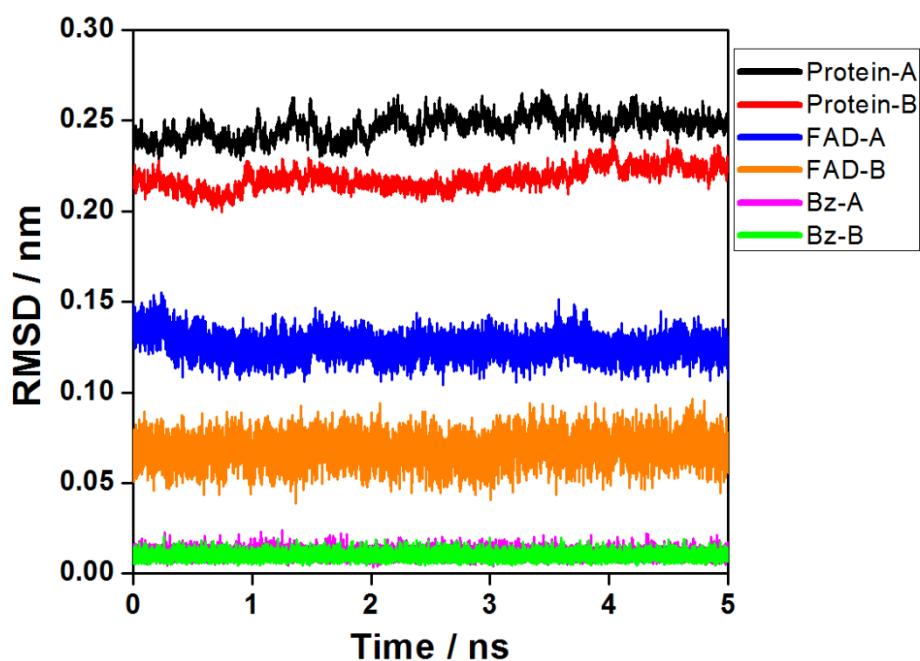

Fig. S3 Time-evolution of root of mean square deviation (RMSD).

The RMSD were obtained by AMBER 10. MDS calculations from the last 5 ns of a 30 ns simulation. Protein-A and protein-B denote Sub A and Sub B in the DAOB dimer. FAD-A and FAD-B denote the FAD in Sub A and Sub B, and Bz-A and Bz-B denote Bz in Sub A and Sub B, respectively. RMSDs of FAD and Bz were steady over the MDS time range of 25–30 ns, whilst the subunits were almost at equilibrium.

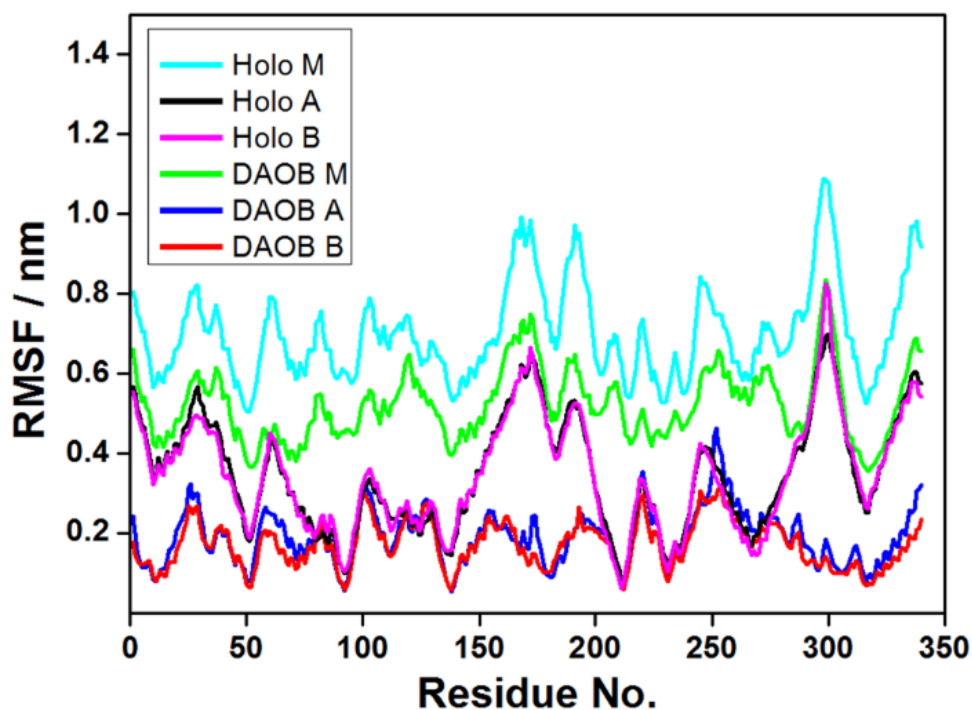

Fig. S4 Comparoson of RMSF in DAOB dimer with other DAAO species.

Root of mean square fluctuations (RMSF), as obtained by AMBER10. Holo M, Holo A and Holo B in insert denote the holoDAAO monomer, Sub A and Sub B of the holoDAAO dimer, respectively. DAOB M, DAOB A and DAOB B denote the monomer of DAOB, Sub A and Sub B of the DAOB dimer, respectively. RMSFs of the holoDAAO monomer were taken from Nueangaudom *et al.* (2012),<sup>31</sup> those for holoDAAO dimer from Nueangaudom *et al.* (2014),<sup>34</sup> and those of DAOB monomer from Nueangaudom *et al.* (2012)<sup>33</sup>.

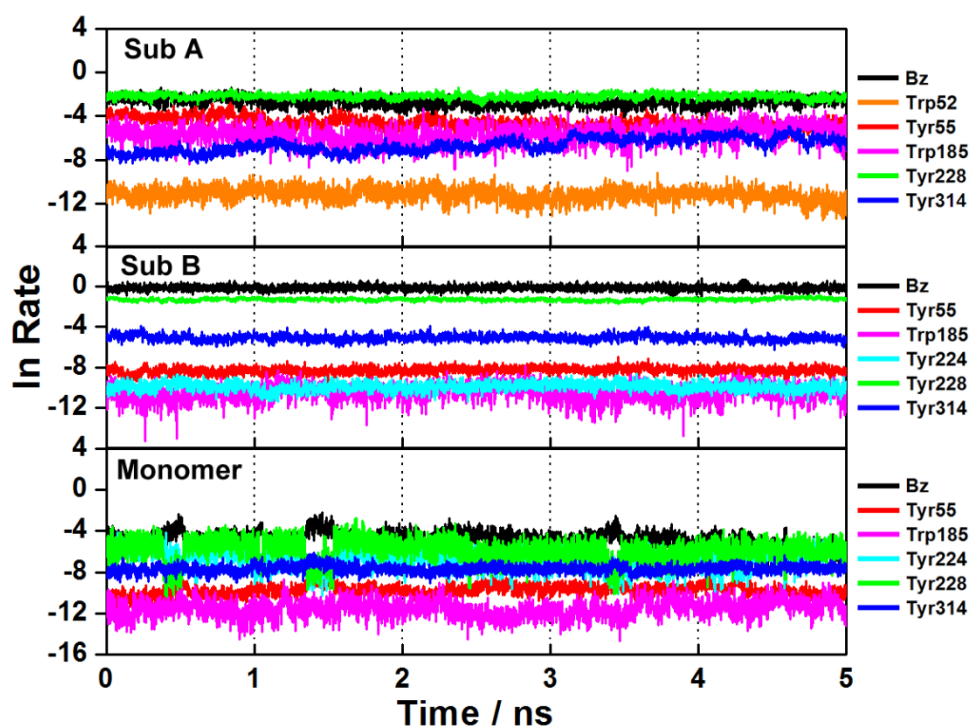

Fig. S5 Dynamics (time-evolution) of the logarithmic ET rate of the six fastest donors. Upper, middle and lower panels show the logarithmic ET rates of Sub A, Sub B and the monomer, respectively. The rates were obtained with Method 2.

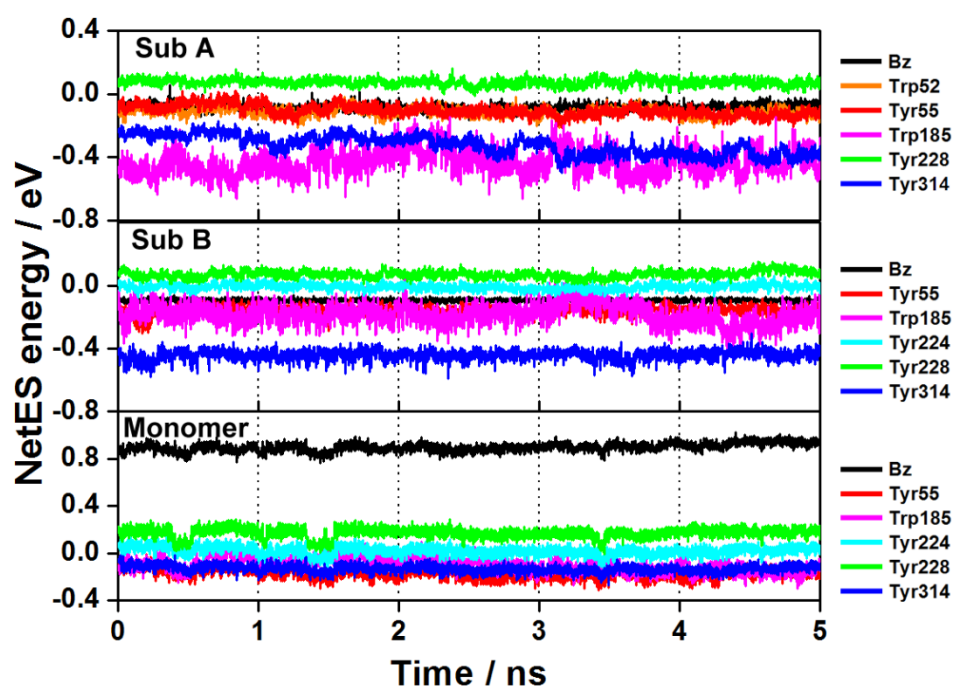

Fig. S6 Time-evolution of the NetES energy between the photoproducts as the Iso acceptor and the six fastest donators (ionic groups) in the DAOB dimer.

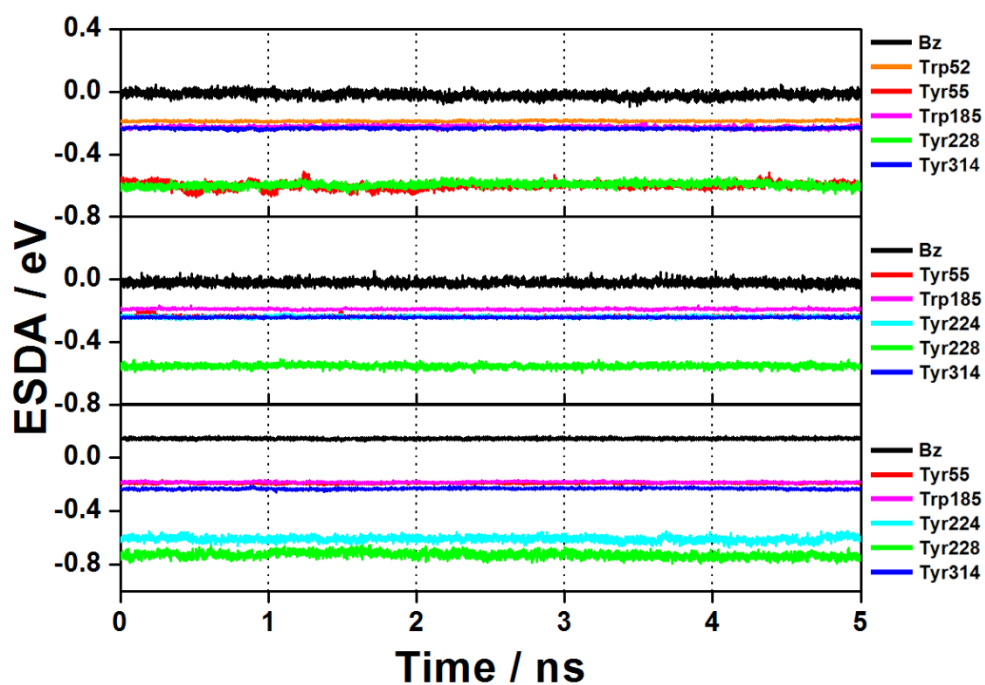

Fig. S7 Time-evolution of the ESDA between the Iso acceptor and the six fastest donators (Bz, Trp or Tyr cations) in the DAOB dimer.

ESDA (electrostatic energy between the iso anion and the donor cation or neutral Bz) was derived as  $-e^2 / \epsilon_{DA} R_j$  from eqn (1) for Trp and Tyr, where the static dielectric constants  $\epsilon_{DA}^A$  and  $\epsilon_{DA}^B$  were used for Sub A and Sub B, respectively, or from eqn (11) for Bz.

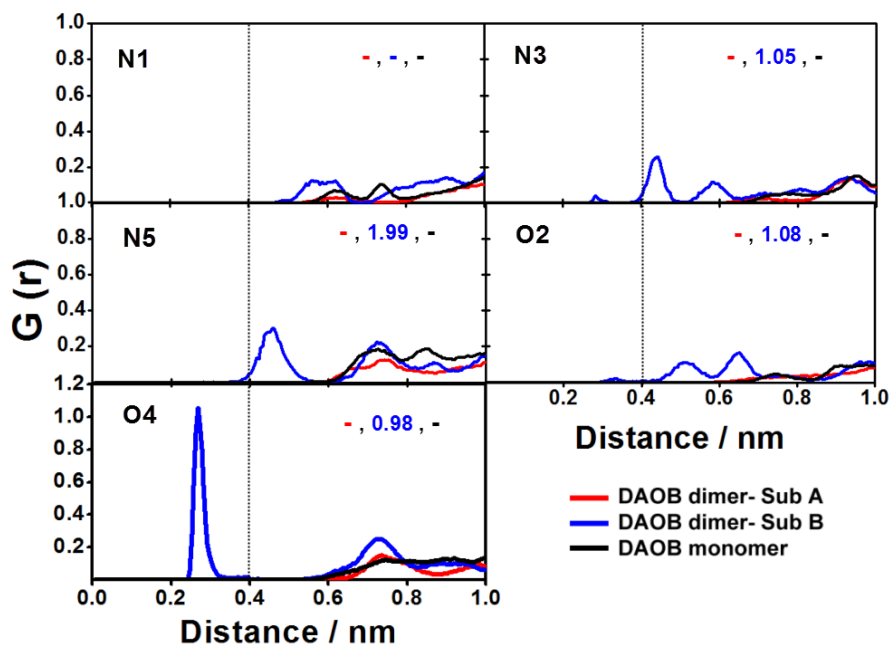

Fig. S8 The radial distribution functions of water molecules near the heteroatoms of Iso.

The radial distribution functions (RDF) were obtained by *ptraj* module of Amber 10 program. Red, blue and black numbers are shown number of mean water molecules of DAOB dimer, Sub A and Sub B and DAOB monomer,<sup>33</sup> respectively.

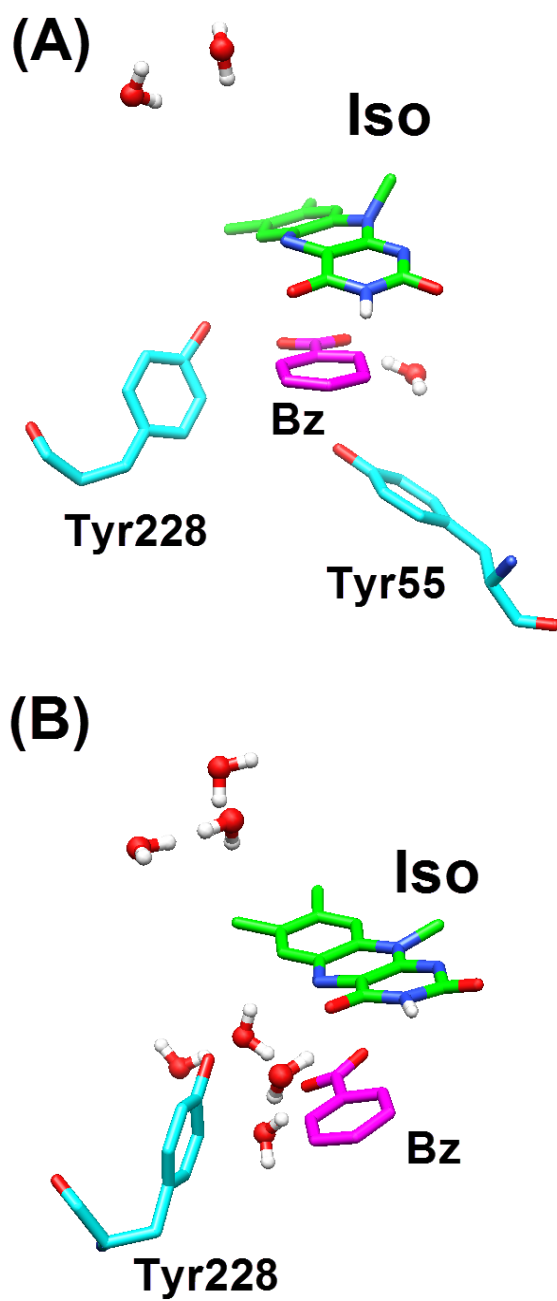

Fig. S9 Presence of water molecules near Iso and ET donors in a snapshot.

Panel (A) shows Sub A and (B) Sub B. ET donors are shown with  $R_c$  shorter than 1 nm.

Water molecules selected are shown with the distance from IsoN5 shorter than 0.7 nm.

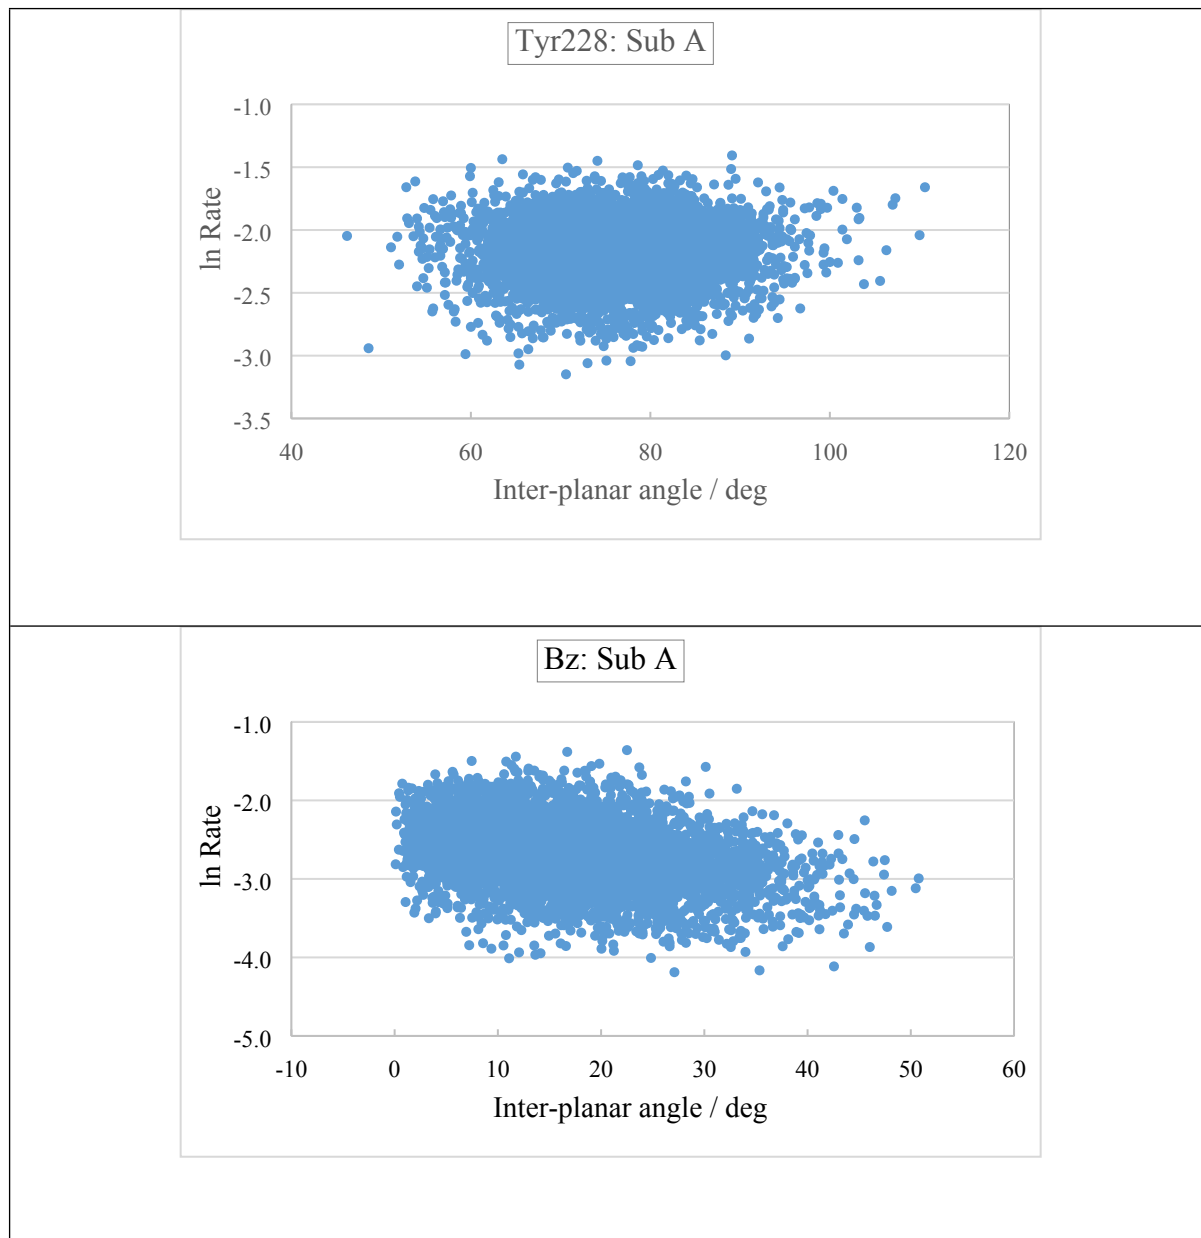

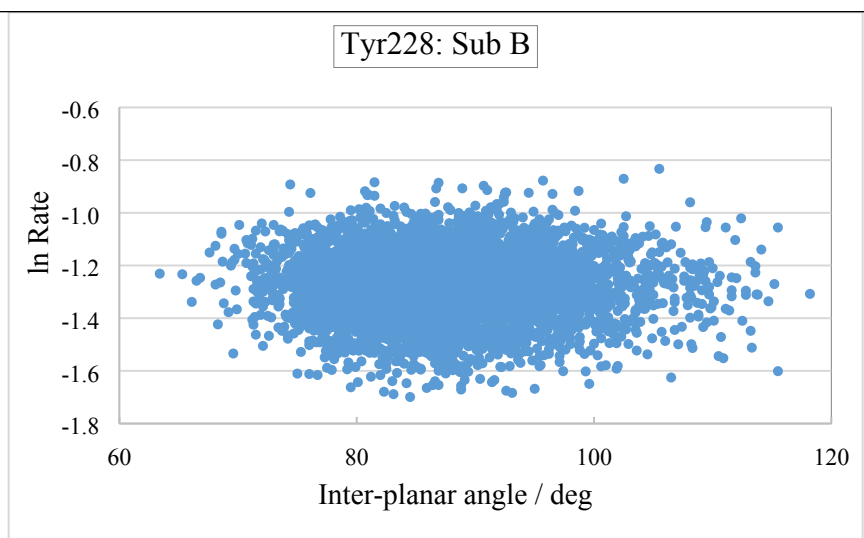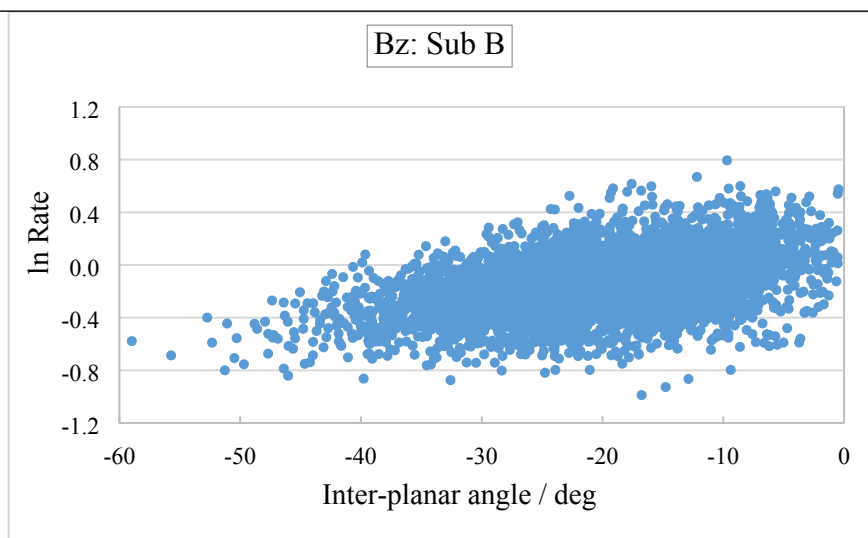

Figure S10 Relationship between logarithmic ET rates and inter-planar angles between Iso and main donors.

# Sub A

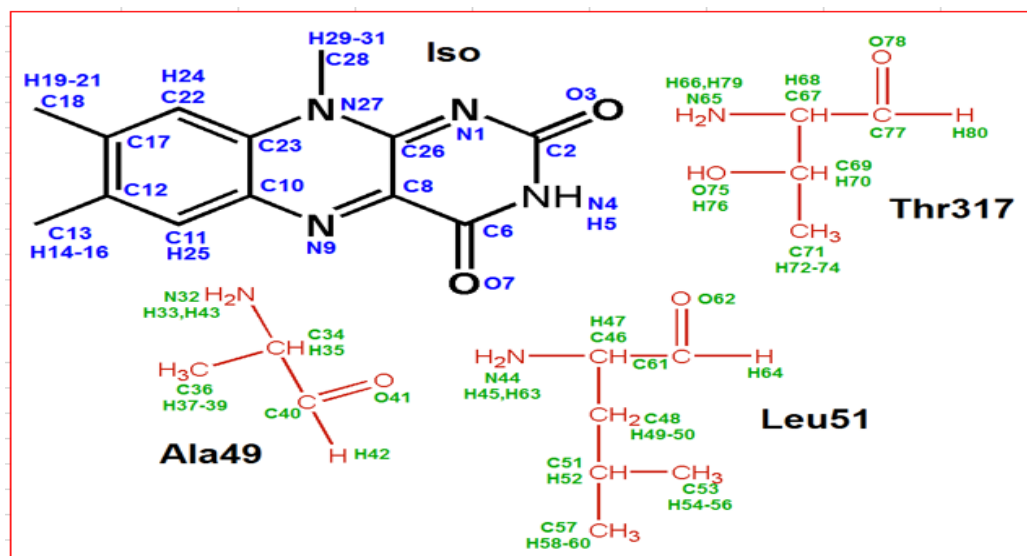

# Sub B

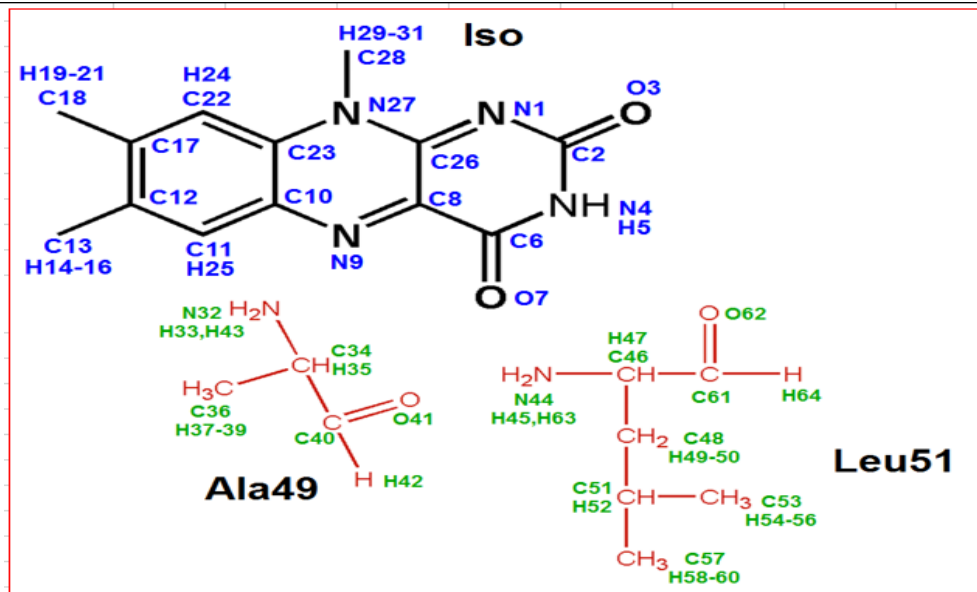

Figure S11 Atom numbering of hydrogen bonded systems in DAOB dimer for MOPAC calculation.

Iso forms hydrogen bondings (H-bond) with Ala49, Leu51 and Thr317 in Sub A, while it forms H-bonds with Ala49 and Leu51 in Sub B.

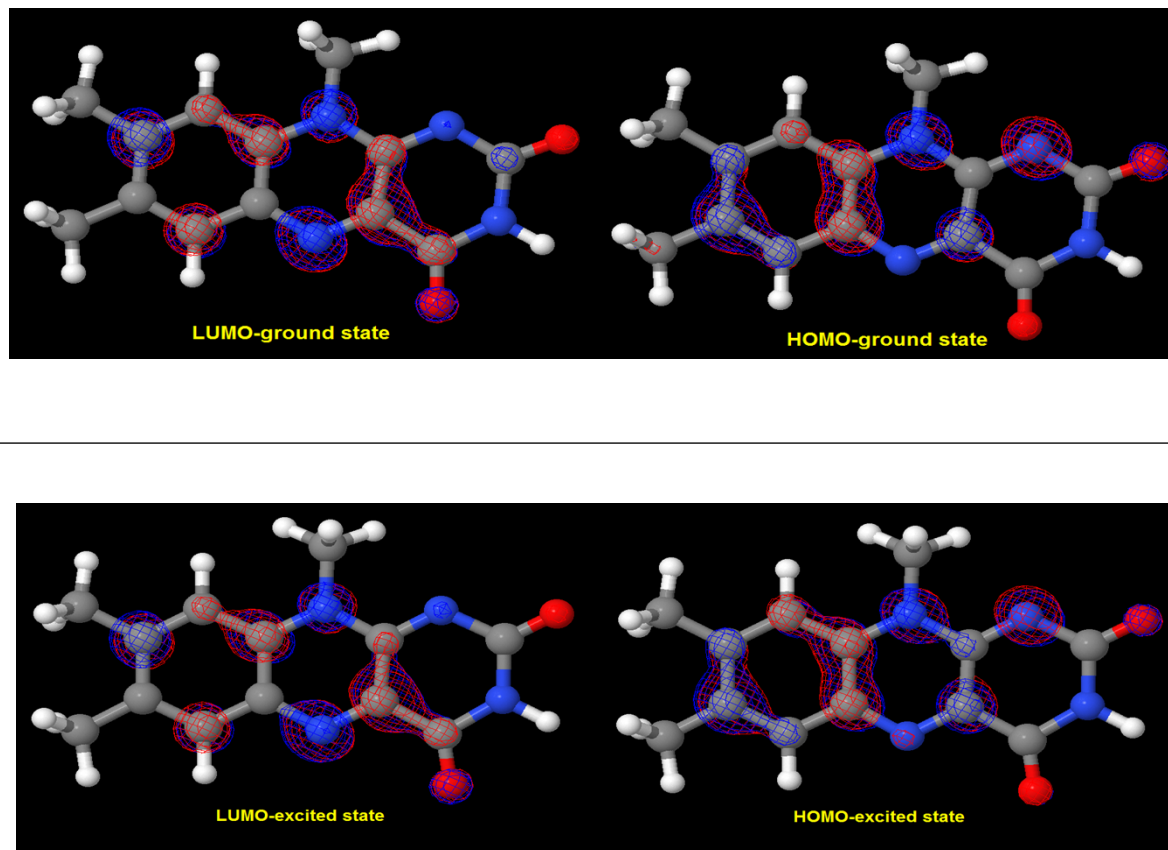

Figure S12 HOMO-LUMO orbitals of Iso alone.

MOs were calculated with semi-empirical MOPAC method. PM6 basis set was used. Other key words were same with those in the previous work,<sup>35</sup> except for EPS (static dielectric constant) key words which were all 2.6 ( $\epsilon_0^{DA}$  was nearly equal to  $\epsilon_0^{DB}$ , 2.6, see Table 3) in the present work.

Table S1 Decay parameters of the DAOB dimer<sup>a</sup>

| Wavelength ( $\lambda_i$ ) | $\tau_1$ | $\alpha_1$ | $\tau_2$ | $\alpha_2$ |
|----------------------------|----------|------------|----------|------------|
| (nm)                       | (ps)     |            | (ps)     |            |
| 480                        | 0.30     | 0.815      | 1.9      | 0.185      |
| 485                        | 0.42     | 0.71       | 4.23     | 0.29       |
| 490                        | 0.506    | 0.600      | 4.46     | 0.400      |
| 510                        | 0.942    | 0.22       | 4.47     | 0.78       |
| 530                        | 1.486    | 0.337      | 4.95     | 0.663      |
| 550                        | 1.46     | 0.36       | 5.00     | 0.64       |
| 580                        | 0.94     | 0.26       | 4.52     | 0.74       |
| 600                        | 0.877    | 0.25       | 4.40     | 0.75       |
| 630                        | 0.84     | 0.486      | 6.46     | 0.514      |
| 640                        | 0.713    | 0.47       | 7.34     | 0.53       |

<sup>a</sup> Data are taken from Mataga *et al.* (2000)<sup>21</sup>.

Table S2. ET parameters in the DAOB monomer obtained with a similar model as with the DAOB dimer<sup>a</sup>

| Protein      | $G_{Iso}^0$<br>(eV) | $R_0^{Bz}$<br>(nm) | $\epsilon_0$ | $\epsilon_0^{DA}$ | $\chi^2$               |
|--------------|---------------------|--------------------|--------------|-------------------|------------------------|
| DAOB monomer | 8.53                | 0.384              | 5.78         | 2.45              | $4.38 \times 10^{-21}$ |

<sup>a</sup> ET parameters were recalculated with the model where the static dielectric constant in the region between Iso and the donors with Rc values of less than 1 nm (Bz, Tyr224 and Tyr228)<sup>33</sup> was  $\epsilon_0^{DA}$  (eqn (2) and Nueungaudom *et al.* (2014)<sup>34</sup>). In the previous work<sup>33</sup> the dielectric constant in this region between Iso and these donors was assumed to be equal to  $\epsilon_0$ .

Table S3 Charge density of Iso with and without H-bonds<sup>a</sup>

| Molecule | Atom No. | Iso without H-bond |         | Ground |        | Excited |        |
|----------|----------|--------------------|---------|--------|--------|---------|--------|
|          |          | Ground             | Excited | Sub A  | Sub B  | Sub A   | Sub B  |
| Iso      | 1        | -0.613             | -0.467  | -0.616 | -0.614 | -0.440  | -0.471 |
|          | 2        | 0.747              | 0.713   | 0.750  | 0.750  | 0.716   | 0.717  |
|          | 3        | -0.519             | -0.498  | -0.514 | -0.510 | -0.480  | -0.484 |
|          | 4        | -0.621             | -0.616  | -0.620 | -0.624 | -0.615  | -0.616 |
|          | 5        | 0.325              | 0.324   | 0.343  | 0.340  | 0.342   | 0.338  |
|          | 6        | 0.659              | 0.651   | 0.662  | 0.661  | 0.653   | 0.653  |
|          | 7        | -0.501             | -0.489  | -0.535 | -0.525 | -0.511  | -0.523 |
|          | 8        | -0.194             | -0.122  | -0.211 | -0.212 | -0.106  | -0.131 |
|          | 9        | -0.101             | -0.298  | -0.093 | -0.090 | -0.277  | -0.285 |
|          | 10       | -0.074             | 0.246   | -0.075 | -0.082 | 0.219   | 0.237  |
|          | 11       | -0.085             | -0.319  | -0.079 | -0.075 | -0.278  | -0.302 |
|          | 12       | -0.028             | 0.247   | -0.029 | -0.035 | 0.230   | 0.244  |
|          | 13       | -0.477             | -0.538  | -0.477 | -0.476 | -0.537  | -0.539 |
|          | 14       | 0.174              | 0.197   | 0.173  | 0.172  | 0.197   | 0.196  |
|          | 15       | 0.174              | 0.196   | 0.176  | 0.172  | 0.197   | 0.191  |
|          | 16       | 0.172              | 0.190   | 0.172  | 0.175  | 0.190   | 0.200  |
|          | 17       | 0.211              | -0.060  | 0.216  | 0.217  | -0.077  | -0.065 |
|          | 18       | -0.526             | -0.475  | -0.527 | -0.528 | -0.476  | -0.476 |
|          | 19       | 0.189              | 0.174   | 0.189  | 0.179  | 0.175   | 0.171  |
|          | 20       | 0.189              | 0.175   | 0.190  | 0.189  | 0.175   | 0.175  |
|          | 21       | 0.179              | 0.171   | 0.179  | 0.190  | 0.171   | 0.175  |
|          | 22       | -0.348             | -0.209  | -0.352 | -0.353 | -0.209  | -0.211 |
|          | 23       | 0.193              | -0.021  | 0.198  | 0.201  | -0.026  | -0.023 |
|          | 24       | 0.194              | 0.181   | 0.195  | 0.194  | 0.183   | 0.182  |
|          | 25       | 0.188              | 0.212   | 0.187  | 0.188  | 0.210   | 0.214  |
|          | 26       | 0.384              | 0.323   | 0.387  | 0.387  | 0.317   | 0.329  |
|          | 27       | -0.137             | -0.129  | -0.138 | -0.144 | -0.179  | -0.139 |
|          | 28       | -0.325             | -0.335  | -0.324 | -0.324 | -0.340  | -0.343 |
|          | 29       | 0.212              | 0.209   | 0.210  | 0.177  | 0.209   | 0.183  |
|          | 30       | 0.179              | 0.188   | 0.178  | 0.212  | 0.183   | 0.217  |
|          | 31       | 0.178              | 0.179   | 0.180  | 0.178  | 0.182   | 0.183  |
| Ala49    | 32       |                    |         | -0.553 | -0.553 | -0.553  | -0.557 |
|          | 33       |                    |         | 0.237  | 0.236  | 0.239   | 0.250  |
|          | 34       |                    |         | -0.063 | -0.062 | -0.057  | -0.058 |
|          | 35       |                    |         | 0.165  | 0.165  | 0.163   | 0.161  |
|          | 36       |                    |         | -0.485 | -0.480 | -0.493  | -0.489 |
|          | 37       |                    |         | 0.165  | 0.164  | 0.163   | 0.161  |
|          | 38       |                    |         | 0.172  | 0.169  | 0.171   | 0.170  |

|        |    |        |        |        |        |
|--------|----|--------|--------|--------|--------|
| Leu51  | 39 | 0.165  | 0.172  | 0.174  | 0.170  |
|        | 40 | 0.349  | 0.353  | 0.344  | 0.347  |
|        | 41 | -0.503 | -0.505 | -0.505 | -0.510 |
|        | 42 | 0.128  | 0.120  | 0.131  | 0.133  |
|        | 43 | 0.221  | 0.219  | 0.222  | 0.219  |
|        | 44 | -0.534 | -0.535 | -0.541 | -0.536 |
|        | 45 | 0.230  | 0.238  | 0.242  | 0.236  |
|        | 46 | -0.107 | -0.095 | -0.100 | -0.102 |
|        | 47 | 0.176  | 0.164  | 0.168  | 0.175  |
|        | 48 | -0.327 | -0.325 | -0.322 | -0.330 |
|        | 49 | 0.173  | 0.173  | 0.168  | 0.173  |
|        | 50 | 0.149  | 0.154  | 0.154  | 0.151  |
|        | 51 | 0.030  | 0.031  | 0.025  | 0.031  |
|        | 52 | 0.108  | 0.107  | 0.110  | 0.106  |
|        | 53 | -0.508 | -0.508 | -0.508 | -0.508 |
|        | 54 | 0.155  | 0.160  | 0.156  | 0.160  |
|        | 55 | 0.151  | 0.155  | 0.149  | 0.154  |
|        | 56 | 0.161  | 0.151  | 0.160  | 0.153  |
|        | 57 | -0.509 | -0.509 | -0.507 | -0.509 |
|        | 58 | 0.153  | 0.154  | 0.154  | 0.154  |
|        | 59 | 0.156  | 0.155  | 0.156  | 0.156  |
|        | 60 | 0.159  | 0.158  | 0.157  | 0.158  |
|        | 61 | 0.365  | 0.362  | 0.364  | 0.362  |
|        | 62 | -0.523 | -0.520 | -0.522 | -0.526 |
|        | 63 | 0.125  | 0.221  | 0.222  | 0.226  |
|        | 64 | 0.225  | 0.118  | 0.121  | 0.121  |
| Thr317 | 65 | -0.525 |        | -0.530 |        |
|        | 66 | 0.228  |        | 0.230  |        |
|        | 67 | -0.227 |        | -0.227 |        |
|        | 68 | 0.198  |        | 0.199  |        |
|        | 69 | 0.251  |        | 0.255  |        |
|        | 70 | 0.110  |        | 0.111  |        |
|        | 71 | -0.538 |        | -0.539 |        |
|        | 72 | 0.182  |        | 0.181  |        |
|        | 73 | 0.174  |        | 0.176  |        |
|        | 74 | 0.173  |        | 0.175  |        |
|        | 75 | -0.590 |        | -0.599 |        |
|        | 76 | 0.349  |        | 0.350  |        |
|        | 77 | 0.365  |        | 0.367  |        |
|        | 78 | -0.492 |        | -0.492 |        |
|        | 79 | 0.228  |        | 0.231  |        |
|        | 80 | 0.112  |        | 0.112  |        |

a Charge densities were obtained with a semi-empirical MO of MOPAC (PM6). Other key words were same with those in the previous work,<sup>35</sup> except for EPS (static dielectric constant) key words which were all 2.6 ( $\epsilon_0^{DA}$  was nearly equal to  $\epsilon_0^{DB}$ , 2.6, see Table 3) in the present work. Ground and Excited denote the ground and excited states of Iso. Atom numbering of Iso and H-bond amino acids are indicated in Figure S11.
